# Supplementary material for: TEMPURA: Database of Growth TEMPeratures of Usual and RAre Prokaryotes
Source: PubMed Central journal article supplement (PMC7511790; doi:10.1264/jsme2.me20074), 2020-07-29
Supplement: 35_20074_s1.pdf [file 35_20074_s1.pdf]

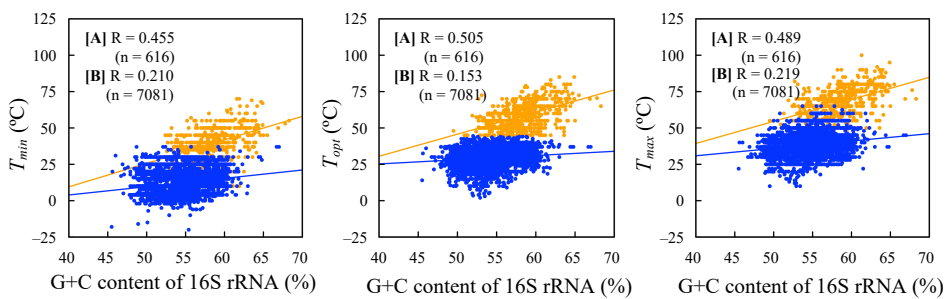

**Fig. S1.** Correlations between the G+C content of 16S rRNA and each growth temperature ( $T_{min}$ ,  $T_{opt}$ , and  $T_{max}$ ) in thermophilic and hyperthermophilic ([A], orange, and orange line), and the other bacterial strains ([B], blue circle, and blue line). Correlation was determined using the Pearson correlation coefficients (R values).
